# Supplementary material
Source: HighWire-hosted journal article supplement (https://www.cmajopen.ca/highwire/filestream/85614/field_highwire_adjunct_files/0/2020-0248-1-at.pdf)
Supplement: 2020-0248-1-at.pdf [file 2020-0248-1-at.pdf]

**FRAILITY AND NUTRITION SEARCH STRATEGIES  
JUNE 2019**

**MEDLINE**

1951 refs

Database: OVID Medline Epub Ahead of Print, In-Process & Other Non-Indexed Citations, Ovid MEDLINE(R) Daily and Ovid MEDLINE(R) 1946 to Present

|    |                                                                                                     |
|----|-----------------------------------------------------------------------------------------------------|
| 1  | Frail Elderly/ or Frailty/                                                                          |
| 2  | frailty.tw.                                                                                         |
| 3  | (frail adj3 (person? or people or elderly or patient? or individual? or adult? or outpatient?)).tw. |
| 4  | or/1-3                                                                                              |
| 5  | exp nutrition therapy/                                                                              |
| 6  | nutrition\$.tw.                                                                                     |
| 7  | exp diet/                                                                                           |
| 8  | (eat or eating).tw.                                                                                 |
| 9  | (diet? or dietary).tw.                                                                              |
| 10 | (meals or mealtime or meal time).tw.                                                                |
| 11 | or/5-10                                                                                             |
| 12 | 4 and 11                                                                                            |
| 13 | animals/ not (animals/ and human/)                                                                  |
| 14 | 12 not 13                                                                                           |

**EMBASE 3351**

refs

Database: Embase <1974 to 2019 June 10> Search

Strategy:

----- 1

frail elderly/ (9392)

2 frailty/ (6812)

3 (frail adj3 (person? or people or elderly or patient? or individual? or adult? or outpatient?)).tw. (10767)

4 frailty.tw. (16350)

5 or/1-4 (28736)

6 nutrition/ or exp diet/ or exp dietary intake/ or geriatric nutrition/ or nutrition education/ or nutritional assessment/ or nutritional counseling/ or nutritional health/ (808869)

7 nutrition\$.tw. (328534)

8 (eat or eating).tw. (108746)

9 (diet? or dietary).tw. (582389)

10 or/6-9 (1255505)

11 5 and 10 (3514)

12 limit 11 to human (3351)

**COCHRANE**

81 reviews 444

trials

|     |                                                                                                 |        |
|-----|-------------------------------------------------------------------------------------------------|--------|
| ID  | Search Hits                                                                                     |        |
| #1  | MeSH descriptor: [Nutrition Therapy] explode all trees                                          | 8720   |
| #2  | MeSH descriptor: [Diet] explode all trees                                                       | 17123  |
| #3  | nutrition or eat or eating or diet* or meal*                                                    | 121080 |
| #4  | #1 or #2 or #3                                                                                  | 122560 |
| #5  | MeSH descriptor: [Frailty] explode all trees                                                    | 29     |
| #6  | MeSH descriptor: [Frail Elderly] explode all trees                                              | 659    |
| #7  | frail NEAR/3 (person? or people or elderly or patient? or individual? or adult? or outpatient?) | 1907   |
| #8  | frail*                                                                                          | 3135   |
| #9  | #5 or #6 or #7 or #8                                                                            | 3135   |
| #10 | #4 and #9                                                                                       | 537    |

**CINAHL 882**

refs

S12 S4 AND S11  
 S11 S5 OR S6 OR S7 OR S8 OR  
 S9  
 OR S10  
 S10 TI ( meals or mealtime or meal  
 time ) OR AB ( meals or mealtime or  
 meal time )  
 S9 TI nutrition\* OR AB nutrition\* S8  
 TI ( diet# or dietary ) OR AB ( diet#  
 or dietary )  
 S7 TI ( eat or eating ) OR AB ( eat or  
 eating )  
 S6 (MH "Diet Therapy+") Search modes - Boolean/Phrase  
 S5 (MH "Nutrition") OR (MH  
 "Diet+") OR (MH "Geriatric  
 Nutrition")  
 S4 S1 OR S2 OR S3  
 S3 TI ( frail N3 (person# or people  
 or elderly or patient# or individual#  
 or adult# or outpatient#) ) OR AB (  
 frail N3 (person# or people or elderly  
 or patient# or individual# or  
 adult# or outpatient#) )  
 S2 (MH "Frail Elderly")  
 S1 (MH "Frailty Syndrome")
